# Supplementary material
Source: Research Square preprint supplement (doi:10.21203/rs.3.rs-10239066/v1)
Supplement: Supplementary file 2 [file f3fe009dddc6356478ca4705.docx]

# Supplementary Methods

# S1. Rockfall Susceptibility Analysis

Rockfall susceptibility was assessed following the three-dimensional geometric framework of Matasci et al. (2018), implemented in Python. At each surface point P, the local slope geometry is defined by its dip direction αp and dip angle βp, computed from the outward surface normal vector. Points are classified as normal (dz > 0) or overhanging (dz < 0) based on the sign of the vertical normal component.

## S1.1 Planar Failure Susceptibility

Planar failure requires a discontinuity plane to daylight in the slope face with a dip angle less than that of the slope. For joint set with dip direction and dip angle , the kinematic condition is satisfied when , the azimuthal difference between the facet dip direction and is within tolerance , and for non-overhanging facets. For overhanging facets, the condition is instead that the facet dip direction lies within of .

The angle between the surface normal and the joint pole was computed as

(S1)

The planar susceptibility at each point satisfying the kinematic condition is then

(S2)

where is the unit reference area, and and are the mean trace length and spacing of joint set , respectively. Points not satisfying the kinematic condition are assigned . The total planar susceptibility is the sum over all joint sets:

(S3)

## S1.2 Wedge Failure Susceptibility

Wedge failure is controlled by the intersection line of two joint sets and . The unit vector along the intersection line was obtained from the cross product of the two pole vectors,

(S4)

oriented downward (). The plunge direction and plunge angle of the intersection line are

The wedge geometry factor accounts for the combined effect of both joint planes,

(S5)

and the apparent trace lengths projected onto the intersection direction are and , where is the sine of the angle between the two planes. The spacing ratio is

(S6)

The kinematic conditions for wedge failure mirror those for planar failure, replacing and with and . The angle between the surface normal and the intersection line is

(S7)

The number of wedge blocks per unit area is

(S8)

and the wedge susceptibility at each kinematically valid point is

(S9)

All values are floored at zero. Wedge susceptibility is evaluated over all unique joint set pairs and accumulated as

(S10)

## S1.3 Toppling Detachment Susceptibility

Toppling failure is kinematically feasible when the poles of the discontinuity planes dip steeply into the slope. For non-overhanging facets, the condition requires that the facet dip direction lies within of and that . For overhanging facets, the condition requires the facet dip direction to be within of .

Using the same angle , the driving angle for toppling on non-overhanging slopes is defined as , valid when and . The toppling susceptibility for non-overhanging facets is

(S11)

For overhanging facets, the susceptibility is instead expressed in terms of the cotangent of ,

(S12)

valid when and . All values are floored at zero, and the total toppling susceptibility accumulates across all joint sets:

(S13)

## S1.4 Spatial Sampling of Source Points

To correct for spatially uneven acquisition density, the point cloud was thinned prior to modelling using a stratified spatial subsampling procedure. The total susceptibility score was partitioned into equal-width bins by dividing the observed range into uniformly spaced edges,

(S14)

so that bin contains all points satisfying . Each bin was assigned a target density (pts m), so that higher-susceptibility bins retain points at closer spacing. The corresponding minimum inter-point distance was derived from an empirical power-law:

(S15)

yielding values from 1.43 m at pts m down to 0.41 m at pts m. Within each bin, minimum-distance thinning was applied: points were visited in random order and each accepted point caused all neighbours within in the horizontal plane to be discarded. This guarantees a minimum separation of between any two retained points in the same bin. The thinned bins were then concatenated to form the final dataset.

# S2. Impact Density Analysis

Observed and simulated impact locations were projected onto a one-dimensional curvilinear road coordinate. Given a line segment from A(x1, y1) to B(x2, y2) and a point P(x, y), the projection scalar t is:

(S16)

The spatial domain is discretised into equally spaced evaluation nodes with spacing Δs = 50 m:

(S17)

The boxcar density estimator computes the local impact rate within a moving rectangular window of nominal half-width . At each evaluation node , the effective window is clipped to the domain boundaries to avoid edge inflation:

(S18)

(S19)

where is the count of impacts within the clipped window. The lower bound is inclusive and the upper bound inclusive at the domain terminus, eliminating double-counting at window junctions. A half-width of m was used throughout, giving a full window width of 300 m where no boundary clipping occurs.

## S2.1 Cross-Dataset Ordinary Least-Squares Regression

To quantify the spatial agreement between the observed) and simulated density profiles, an ordinary least-squares (OLS) regression was fitted with the observed density as predictor and the simulated density as response . The regression model is

with parameter estimates

where and . The mean squared error is , where are the residuals. The Pearson correlation coefficient and its square were computed as spatial fidelity statistics.

## S2.2 Student- Confidence and Prediction Intervals

Uncertainty in the regression line was quantified using standard Student- inference. At a query point , the fitted value is , and the standard errors of the mean response and of a new individual observation are

where . The 95% confidence interval for the mean response and the 95% prediction interval for a single new observation are

where is the upper quantile of the Student- distribution with degrees of freedom and .

# S3. Hazard Quantification

## S3.1 Segment-Level Validation

**Impact-location matching.** For each observed impact position, the Euclidean distance to the nearest simulated impact was computed. The hit rate (HR) at tolerance radius is the fraction of observed impacts with a nearest simulated impact within ,

(S20)

Where is distance from observed impact to nearest simulated impact and the simulation coverage (SC) is the analogous fraction for simulated impacts,

(S21)

A confidence score was assigned to each observed impact as , where m.

## S3.2 Segment Annual Rate and Poisson Exceedance Probability

The annual rate of rockfall impact at a given road segment *s*, denoted *λs*, is estimated by combining the temporally normalised observed frequency with the fraction of simulated trajectories intersecting that segment,

|  |  | (S22) |
| --- | --- | --- |

where *Nobs* is the total number of observed rockfall events recorded over a monitoring period of *T* years, *ns* is the count of simulated trajectories impacting road segment, and *Nsim* is the total number of simulated trajectories. Then a calibration parameter *ϱ* as the annual rate attributable to a single simulated trajectory define as follow,

|  |  | (S23) |
| --- | --- | --- |

so that Equation (S22) reduces to *λs* = *ϱ ns*. Since *ϱ* is independent of the spatial zone under consideration, it serves as a universal calibration multiplier applicable to any domain for which a simulated impact count is available. Accordingly, the annual impact rate over the net impact zone, characterised by *Nimpact* simulated trajectory intersections, is given by

|  |  | (S24) |
| --- | --- | --- |

Equation (S24) is proportional to the road-segment rate by the ratio *Nimpact* / *nS*, which directly reflects the broader spatial extent of the net impact zone relative to the monitored road corridor.

Under a Poisson process, the probability of at least one impact at segment within an exposure period of years is

(S25)

The mean return period at each segment is . Exceedance probabilities were evaluated at reference periods of 1, 10, 50, and 100 years.

## S3.3 Energy-Exceedance Hazard

Where kinetic energy is available from the simulation output, the hazard was extended to account for impact intensity. The annual rate of an impact exceeding an energy threshold at segment is

(S26)

where is the number of simulated trajectories reaching segment with kinetic energy above . The corresponding Poisson exceedance probability over period is

(S27)

Thresholds of 30, 300, and 1000 kJ were applied, representing approximate damage thresholds for light vehicles, standard rockfall barriers, and high-energy protection structures, respectively.


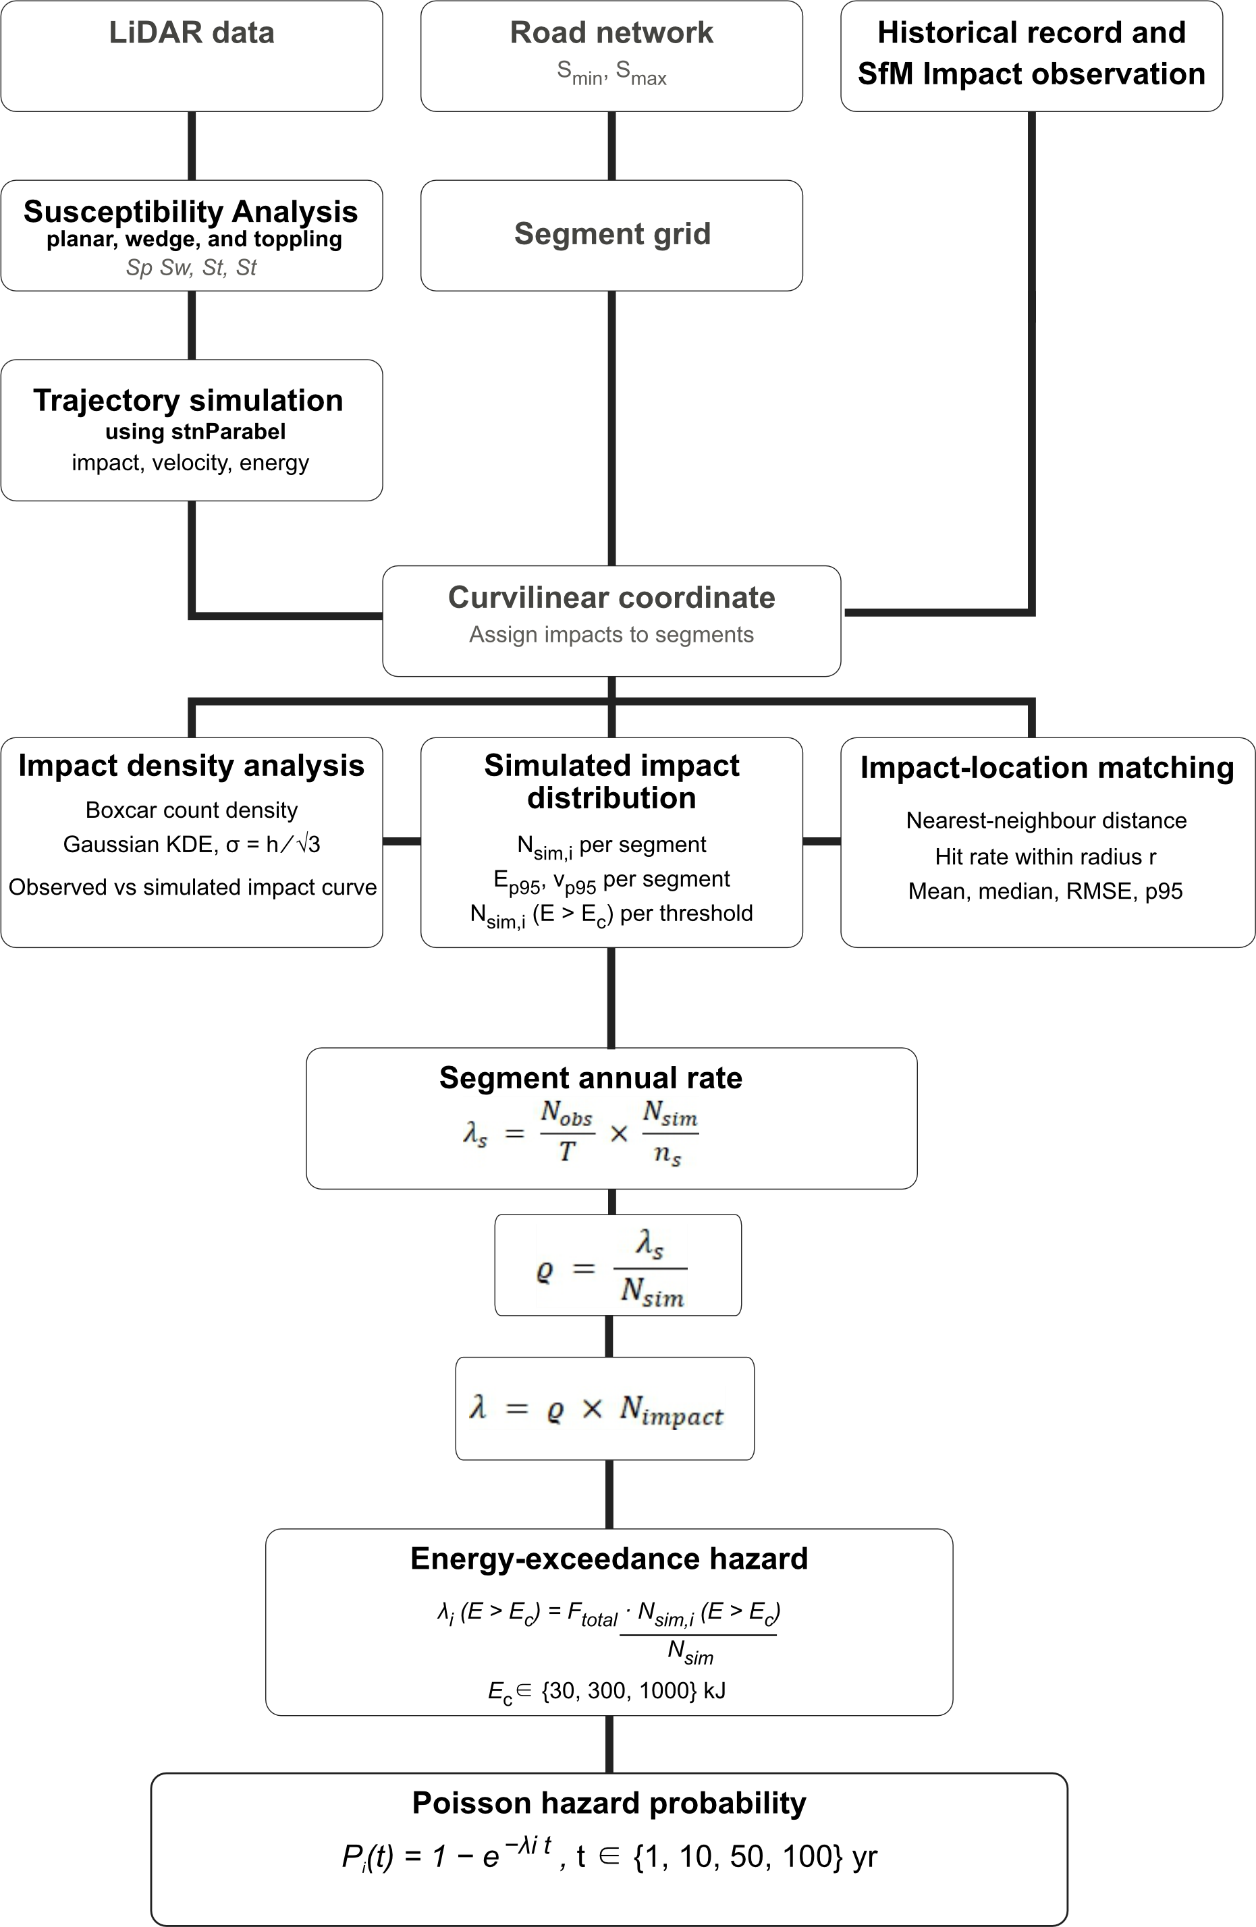


Fig. Supplementary 1 Methodological framework for this study from observed vs simulated impact on the road to hazard calculation.
